# Supplementary material for: Inoculation of bacteria for the bioremediation of heavy metals contaminated soil by Agrocybe aegerita
Source: Royal Society of Chemistry journal article supplement (doi:10.1039/c6ra11767h), 2016-01-01
Supplement: c6ra11767h1.pdf [file c6ra11767h1.pdf]

1 **Supplementary Materials**

2

3 **Inoculation of Bacteria for the Bioremediation of Heavy**

4 **Metals Contaminated Soil by *Agrocybe aegerita***

5

6 Xue Li<sup>a</sup>, Shunwen Dong<sup>b</sup>, Yuan Yao<sup>a</sup>, Wenjin Shi<sup>a</sup>, Minghui Wu<sup>a</sup>, Heng Xu<sup>\*a</sup>

7 <sup>a</sup> Key Laboratory of Bio-resources and Eco-environment (Ministry of Education), College of Life

8 Sciences, Sichuan University, Chengdu, Sichuan 610064, China.

9 <sup>b</sup> Industrial Crop Research Institute of Sichuan Academy of Agricultural Sciences, Chengdu,

10 Sichuan 610300, China

11 \* Corresponding author. Tel: +86 28 85414644; Fax: +86 28 85418262

12 E-mail address: xuheng64@sina.com

13

14

15

16

17

18

19

20

21

22

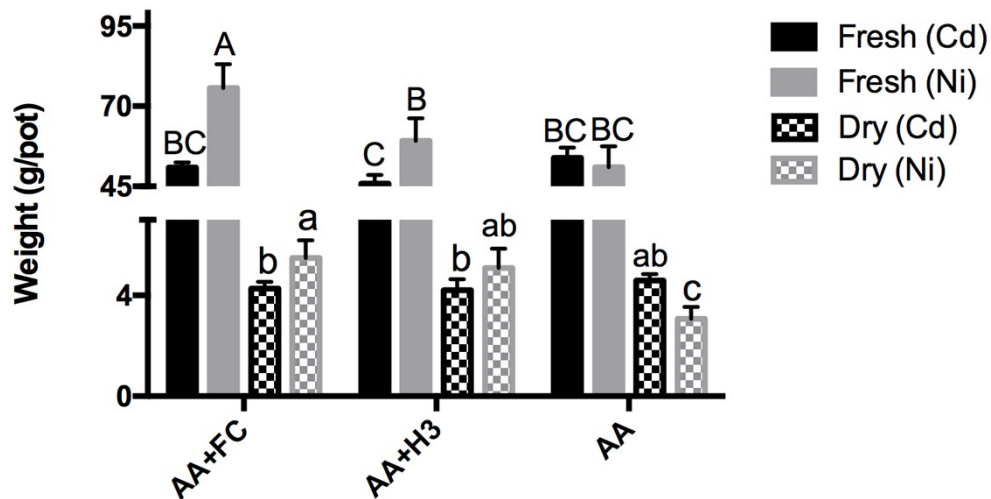

23

24 **Supplementary Figure 1.** Biomass (both fresh and dry weight; g/pot) of *Agrocybe*  
 25 *aegerita* growing in soil of different treatments under single Cd or Ni stress. Error  
 26 bars represent the standard deviation of three sampled pots. Different letters in  
 27 lowercase (a, b and c) indicate significant ( $P < 0.05$ ) difference among dry weights.  
 28 Capital letters (A, B and C) indicate significant ( $P < 0.05$ ) difference among fresh  
 29 weights.

30

31

32

33

34

35

36

37

38

39

40

41

42

43

44

45

46

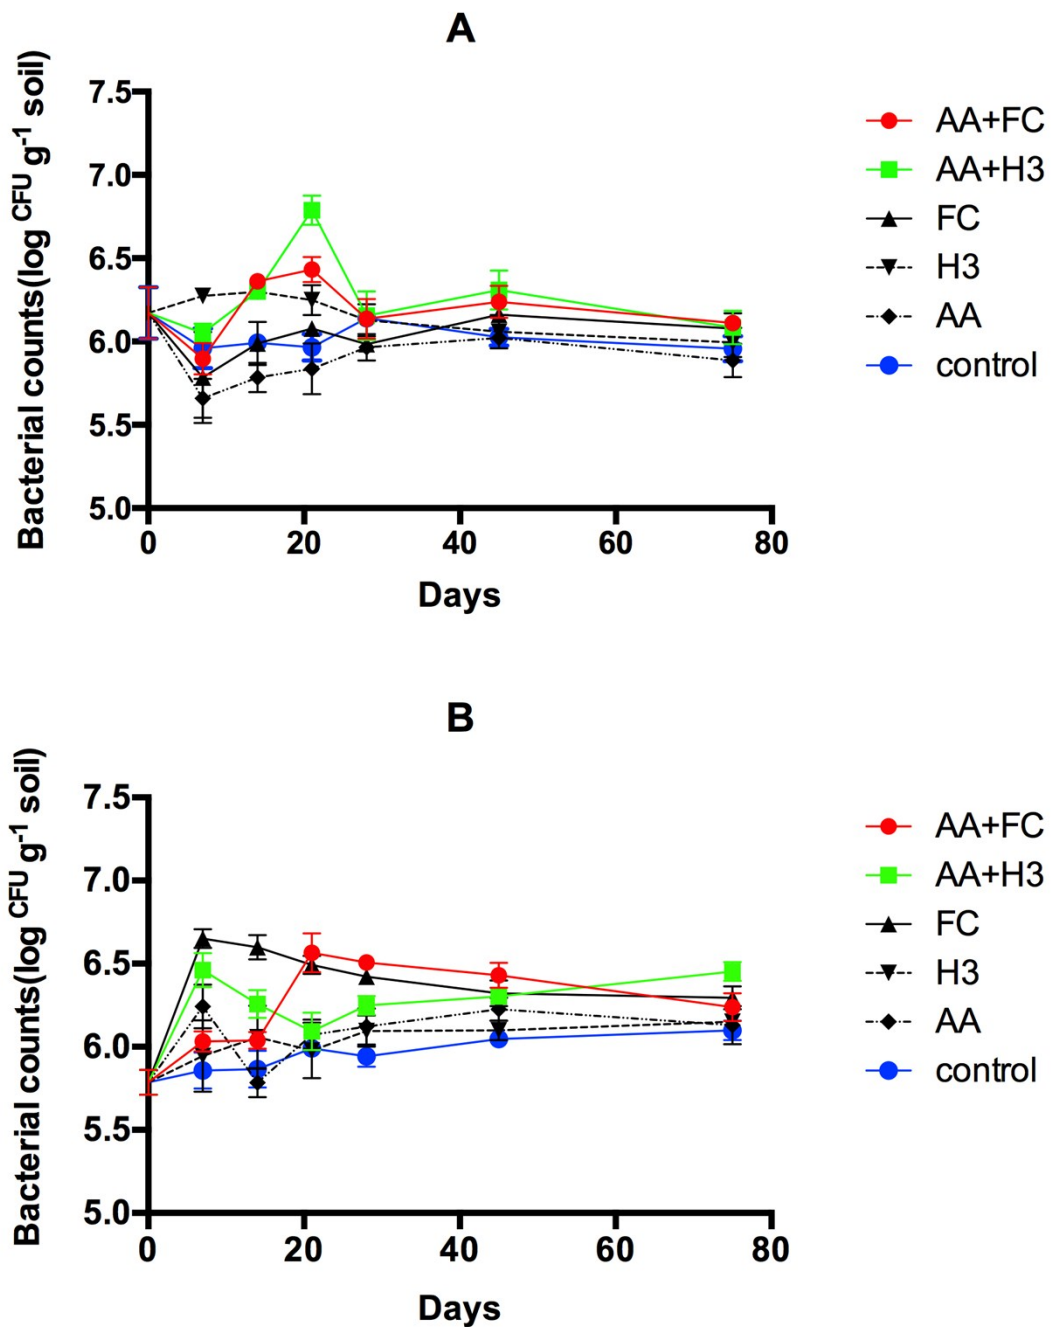

47

48 **Supplementary Figure 2.** Bacterial counts in individual Cd (A) or Ni (B)

49 contaminated soil of different treatments. Error bars represent the standard deviation  
 50 of three sampled pots.

51

52

53

54

55

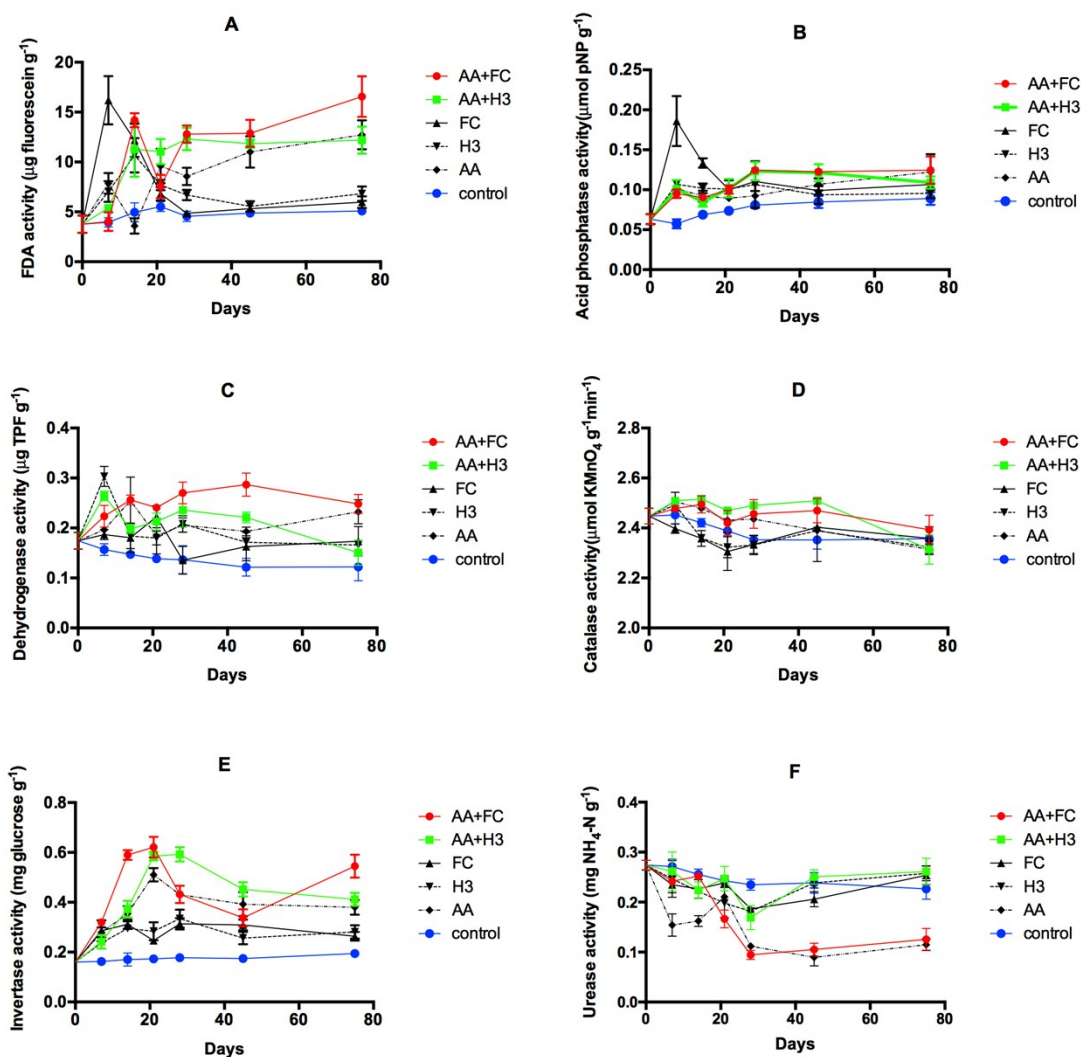

57

58 **Supplementary Figure 3.** Activities of soil enzymes in Cd contaminated soils of  
 59 different treatments. **A:** FDA activity, **B:** acid phosphatase activity, **C:** dehydrogenase  
 60 activity, **D:** catalase activity, **E:** invertase activity, **F:** urease activity. Error bars  
 61 represent the standard deviation of three sampled pots.

62

63

64

65

66

67

68

69

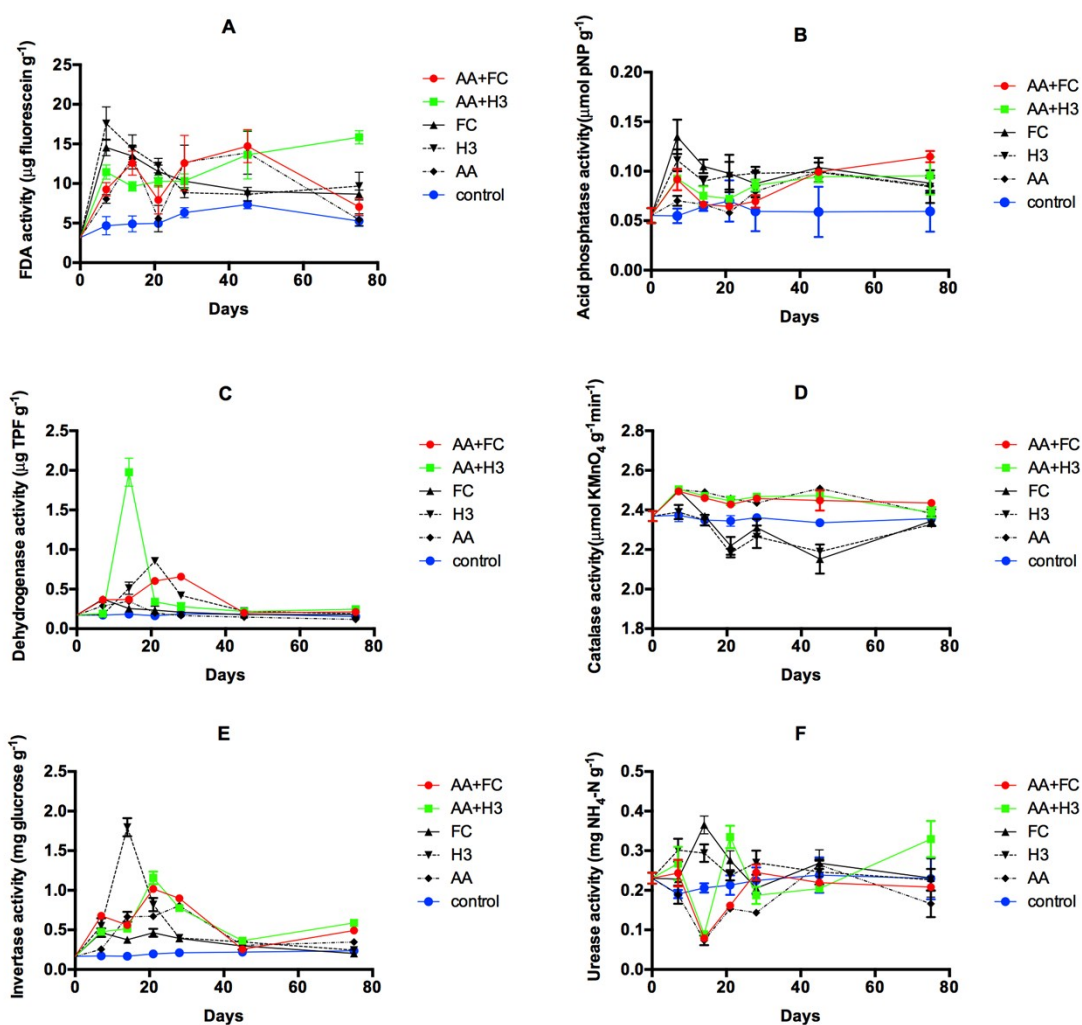

71

72 **Supplementary Figure 4.** Activities of soil enzymes in Ni contaminated soils of  
 73 different treatments. **A:** FDA activity, **B:** acid phosphatase activity, **C:** dehydrogenase  
 74 activity, **D:** catalase activity, **E:** invertase activity, **F:** urease activity. Error bars  
 75 represent the standard deviation of three sampled pots.

76

77

78

79

80

81

82

83

84

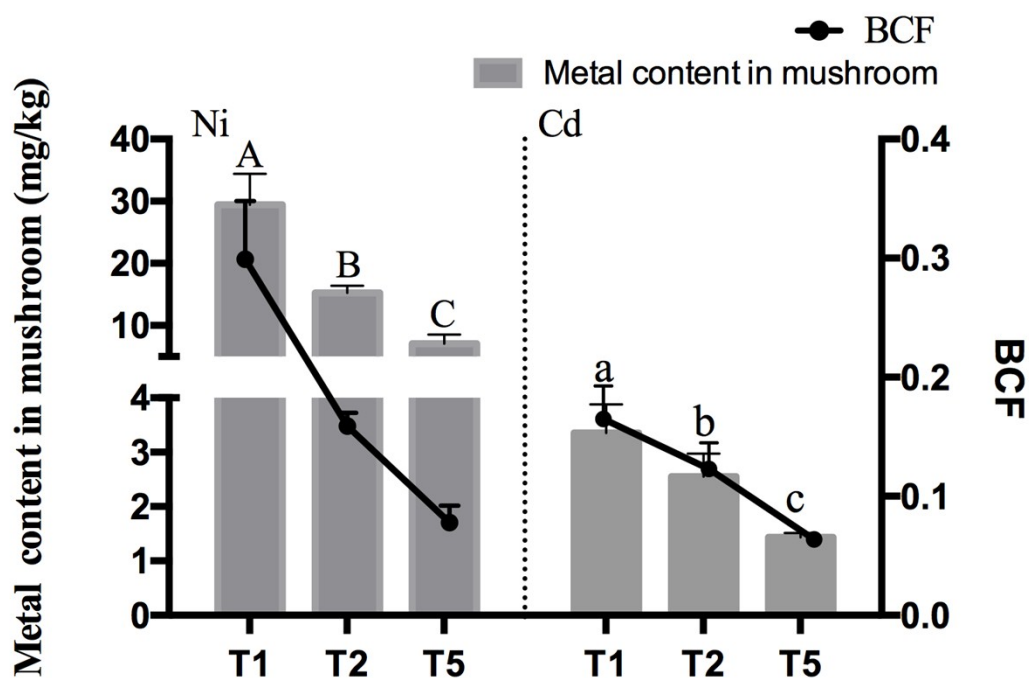

87 **Supplementary Figure 5.** Metal concentrations (column) in *Agrocybe aegerita* and  
 88 bio-concentration factor (BCF) (line) in individual Cd or Ni contaminated soil of  
 89 different treatments. Error bars represent the standard deviation of three sampled pots.  
 90 Different letters in lowercase (a, b and c) indicate significant ( $P < 0.01$ ) difference of  
 91 Cd content in mushroom among different treatments. Capital letters (A, B and C)  
 92 indicate significant ( $P < 0.01$ ) difference of Ni content in mushroom among different  
 93 treatments.

103

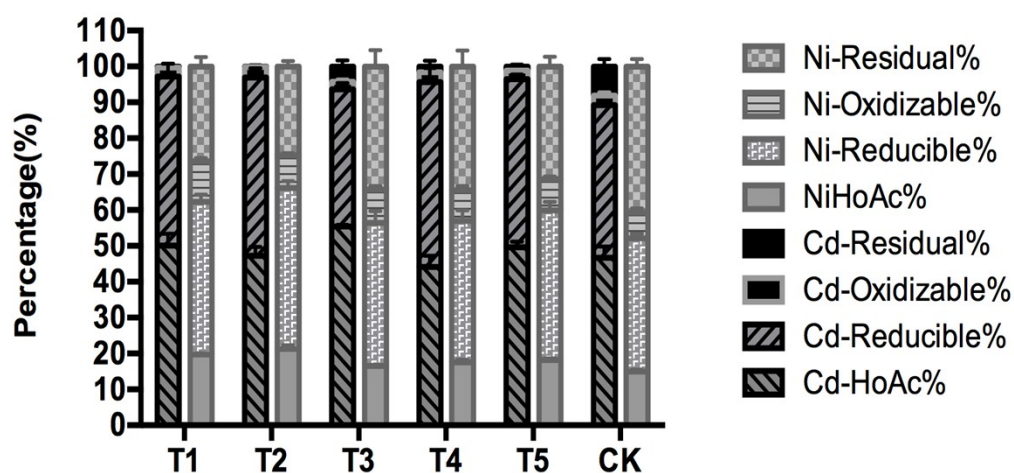

104

105 **Supplementary Figure 6.** Metal speciation in individual Cd or Ni contaminated soil

106 of different treatments.

107

108

109

110

111

112

113

114

115

116

117

118

119

120

121

122

123

124

125

126

127 **Supplementary Table 1.** The Pearson correlation coefficient between bacterial

128 counts and activities of soil enzymes in Cd contaminated soil

---

| Characters       | T1     | T2     | T3       | T4     | T5     | CK      |
|------------------|--------|--------|----------|--------|--------|---------|
| Acid phosphatase | -0.068 | -0.038 | -0.728** | 0.088  | -0.314 | 0.022   |
| FDA              | 0.218  | 0.253  | -0.736** | 0.425  | -0.09  | -0.510* |
| Dehydrogenase    | 0.268  | -0.009 | 0.127    | 0.284  | -0.228 | 0.105   |
| Catalase         | -0.158 | 0.235  | 0.156    | 0.222  | -0.236 | 0.175   |
| Invertase        | 0.276  | 0.308  | -0.35    | 0.008  | -0.253 | -0.267  |
| Urease           | -0.088 | -0.047 | 0.29     | -0.164 | 0.226  | 0.033   |

---

129 \*. Correlation is significant at the 0.05 level.

130 \*\*. Correlation is significant at the 0.01 level.

131

132

133

134

135

136

137

138

139

140



141 **Supplementary Table 2.** The Pearson correlation coefficient between bacterial

142 counts and activities of soil enzymes in Ni contaminated soil

| Characters       | T1      | T2      | T3      | T4     | T5      | CK      |
|------------------|---------|---------|---------|--------|---------|---------|
| Acid phosphatase | 0.19    | 0.794** | 0.847** | 0.41   | 0.567** | 0.139   |
| FDA              | 0.483*  | 0.837** | 0.960** | 0.05   | 0.212   | 0.599** |
| Dehydrogenase    | 0.582** | 0.057   | 0.629** | 0.069  | -0.329  | -0.143  |
| Catalase         | 0.241   | 0.504*  | 0.145   | -0.257 | 0.324   | -0.467* |
| Invertase        | 0.600** | 0.129   | 0.791** | 0.061  | -0.091  | 0.439*  |
| Urease           | 0.033   | 0.121   | 0.329   | -0.177 | 0.393   | 0.196   |

143 \*. Correlation is significant at the 0.05 level.

144 \*\*. Correlation is significant at the 0.01 level.

145
